# Supplementary material for: Seafloor geomorphology of western Antarctic Peninsula bays: a signature of ice flow behaviour
Source: Copernicus journal article supplement (doi:10.5194/tc-2017-108), 2017-06-22
Supplement: Supplementary file 1 [file tc-2017-108-supplement.pdf]

# Supplementary Material

## Figures

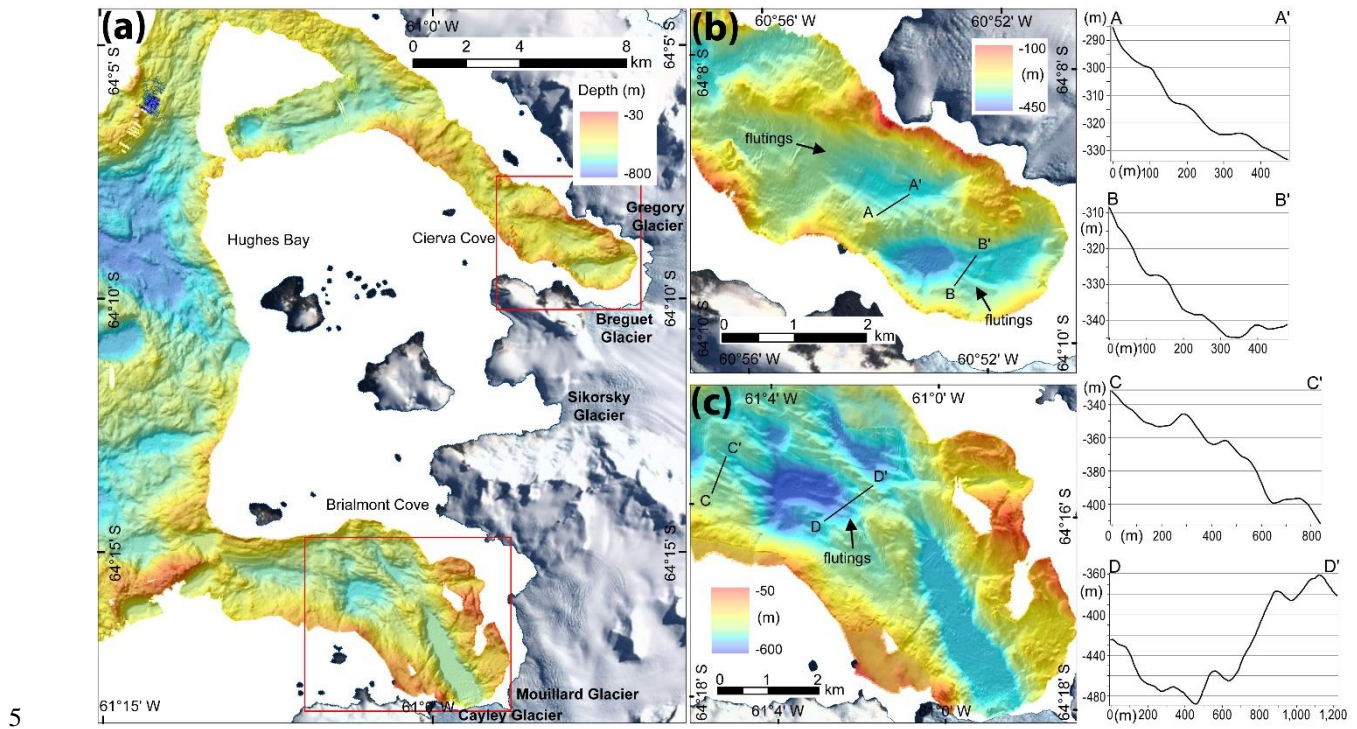

Figure 1: Hughes Bay, showing Cierva Cove (b) and Brialmont Cove (c).

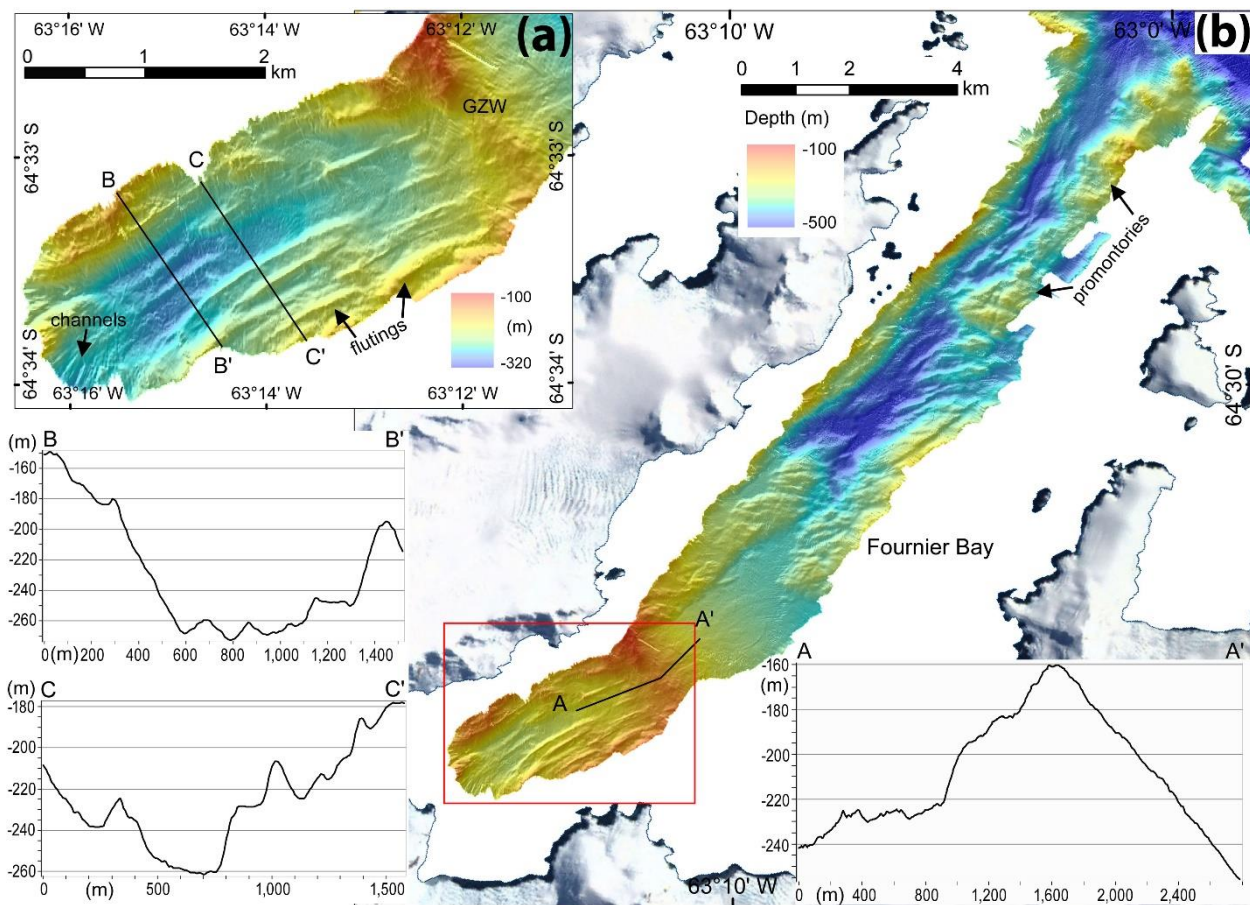

Figure 2: Fournier Bay.

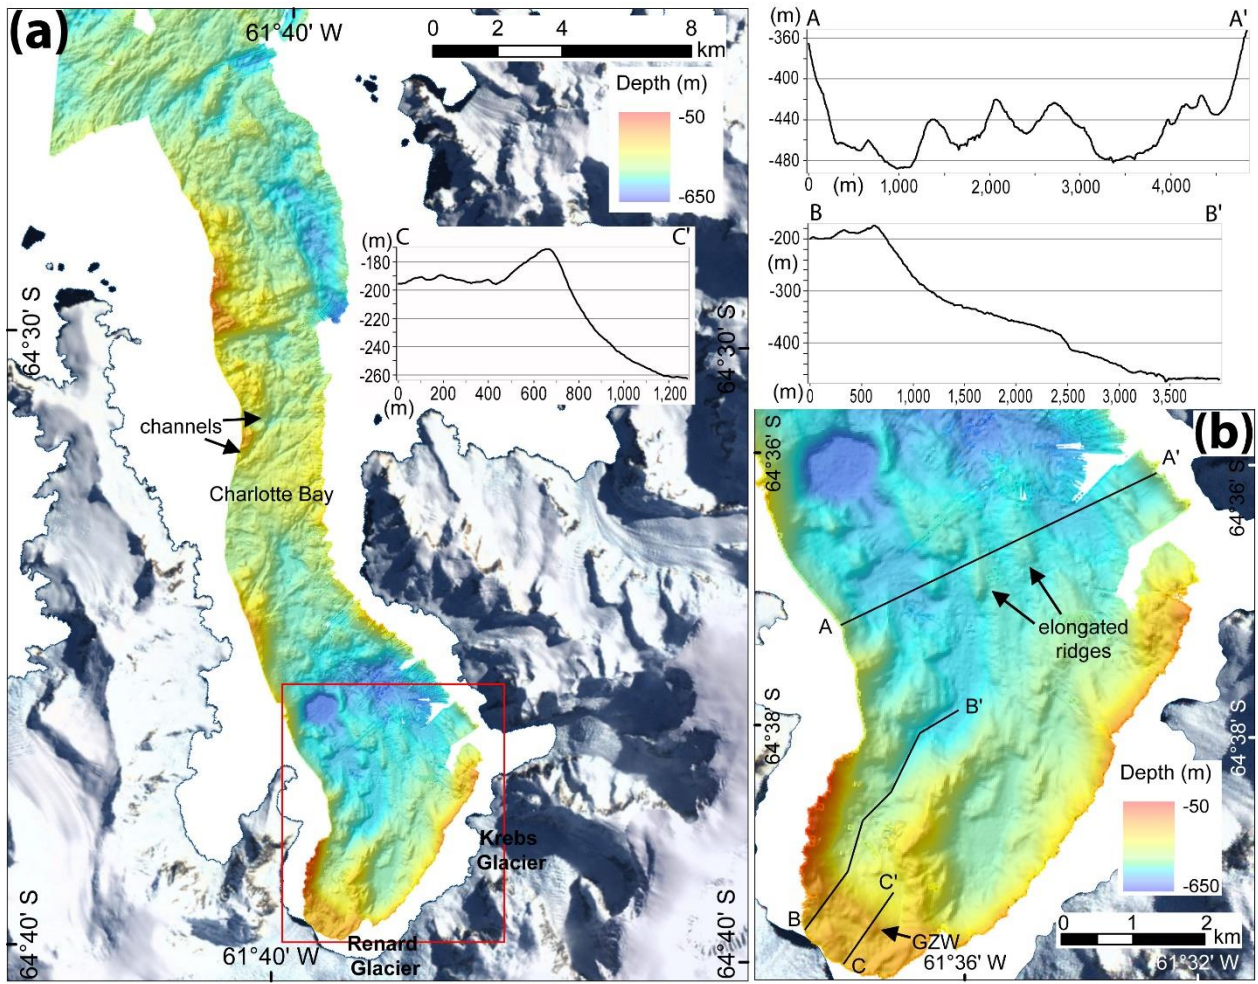

Figure 3: Charlotte Bay.

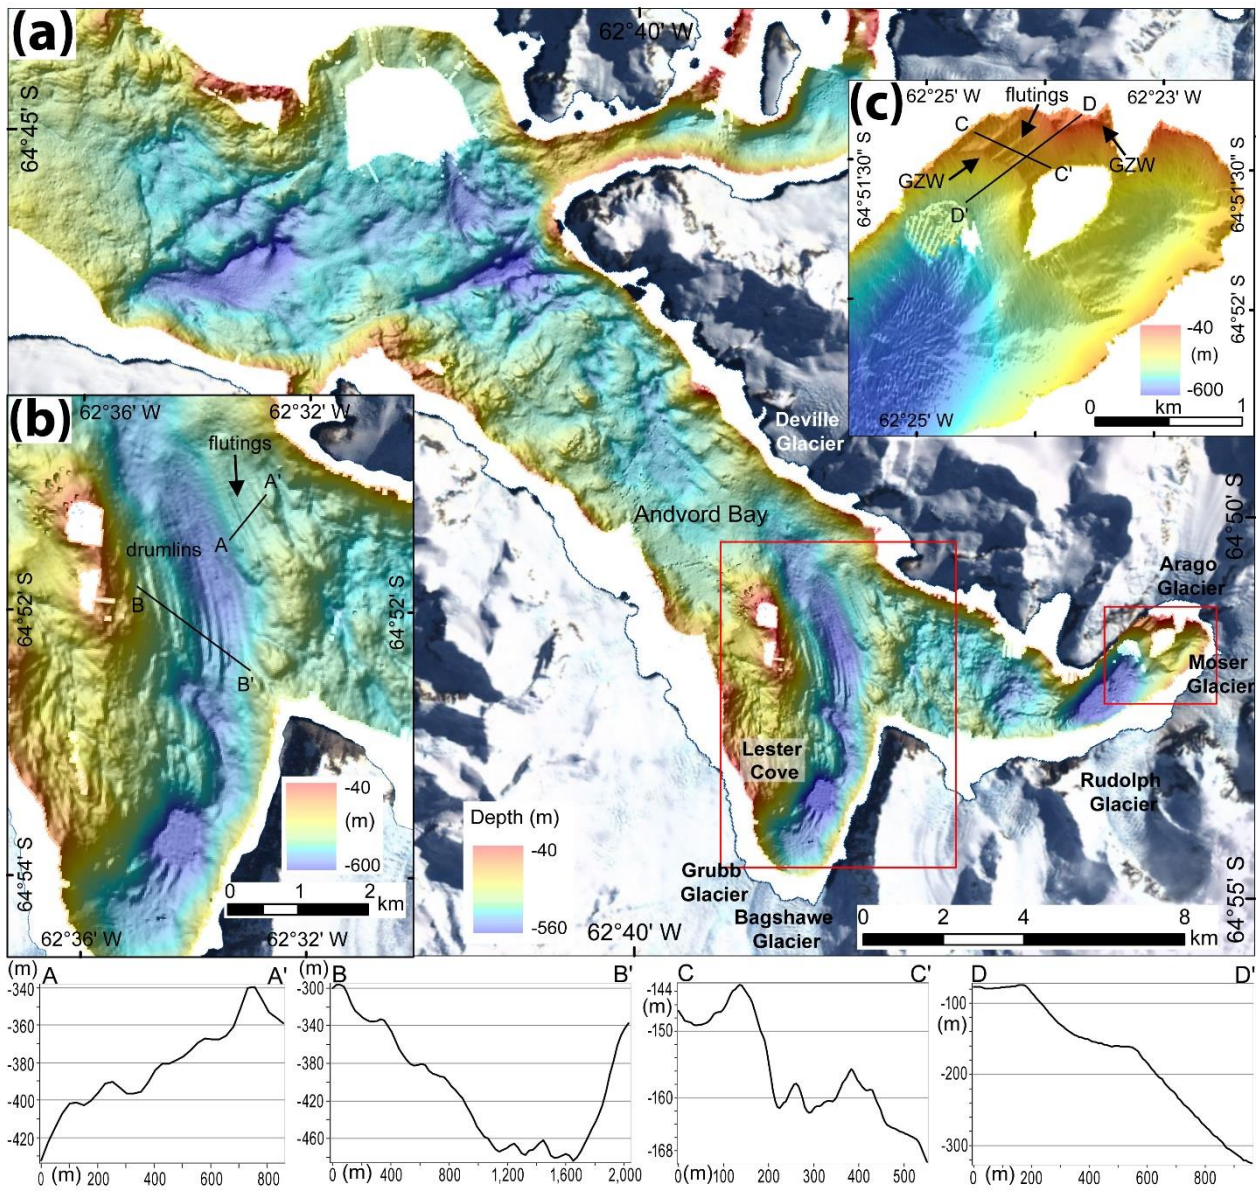

Figure 4: Andvord Bay, also showing Lester Cove (b) and Moser Glacier Cove (c).

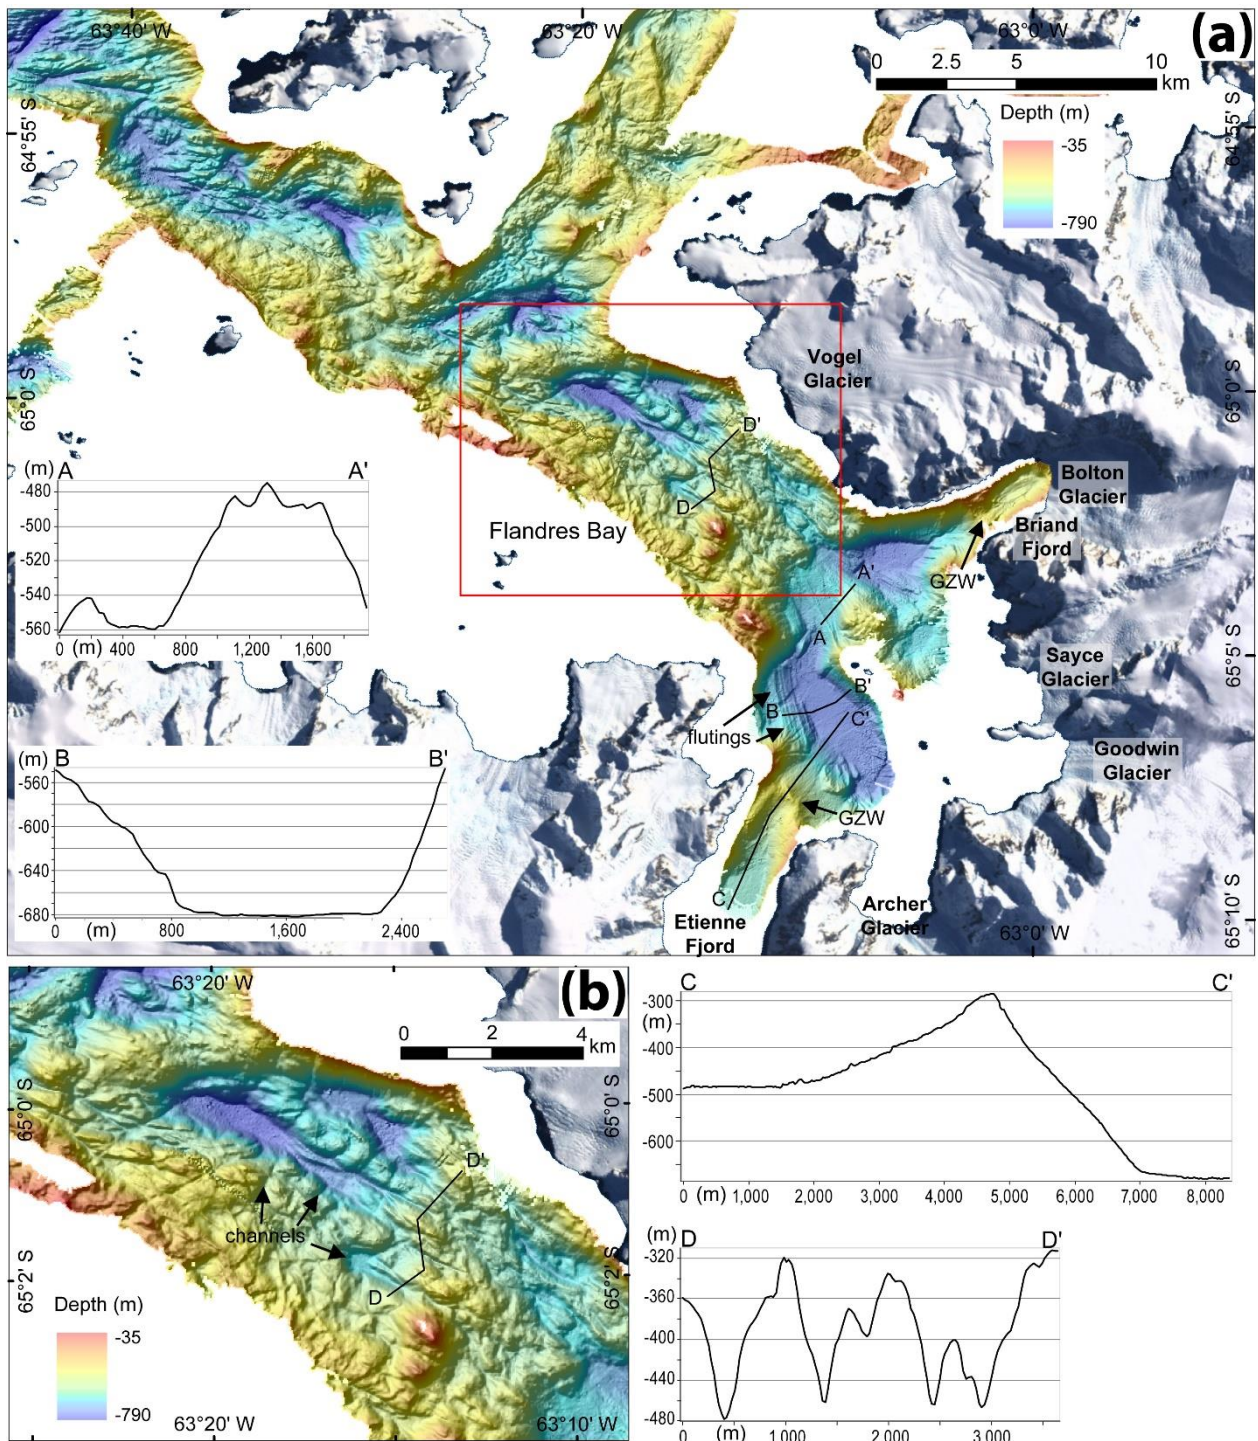

Figure 5: Flandres Bay, also showing Briand Fjord and Etienne Fjord.

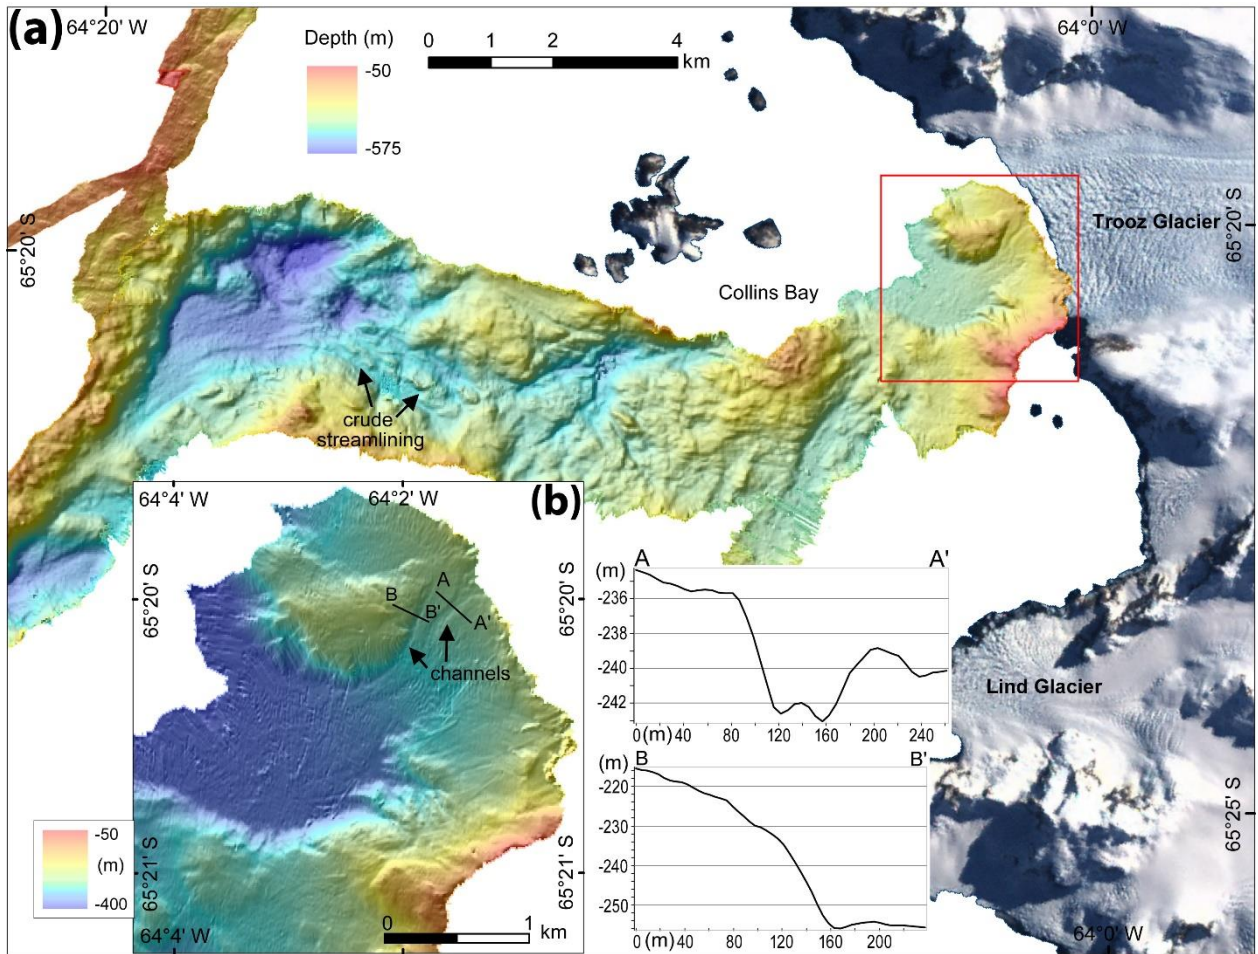

Figure 6: Collins Bay.

Table 1. Measurements of western Antarctic Peninsula bays

| Bay Name                   | Longitude | Latitude | Bay Length (km) | Bay Width (km) | Ratio length/width | Bay Geometry | Number of Glaciers in Total | Total Glacier Catchment Area (km <sup>2</sup> ) | Bay Area (km <sup>2</sup> ) |
|----------------------------|-----------|----------|-----------------|----------------|--------------------|--------------|-----------------------------|-------------------------------------------------|-----------------------------|
| Maxwell-Marian Cove        | -58.769   | -62.213  | 3.8             | 1.2            | 3.2                | narrow       | 1                           | 14.99                                           | 4.868                       |
| Maxwell-Potter Cove        | -58.687   | -62.232  | 4.3             | 1.6            | 2.7                | narrow       | 1                           | 20.26                                           | 7.093                       |
| Hope Bay                   | -57.046   | -63.407  | 5.8             | 2              | 2.9                | narrow       | 4                           | 27.36                                           | 11.448                      |
| Lapeyriere's unnamed       | -63.286   | -64.37   | 4.6             | 1.8            | 2.6                | narrow       | 2                           | 60.05                                           | 7.959                       |
| Lapeyriere Bay             | -63.284   | -64.421  | 11              | 2.6            | 4.2                | narrow       | 7                           | 271.06                                          | 32.496                      |
| Fournier Bay               | -63.178   | -64.546  | 16              | 5.3            | 3.0                | narrow       | 12                          | 169.27                                          | 89.906                      |
| Charlotte Bay              | -61.611   | -64.614  | 15              | 7.5            | 2.0                | narrow       | 13                          | 238.14                                          | 103.153                     |
| Advord Bay                 | -62.566   | -64.857  | 15              | 6              | 2.5                | narrow       | 8                           | 78.83                                           | 79.785                      |
| Advord-Moser Gl. cove      | -62.425   | -64.872  | 9               | 3.5            | 2.6                | narrow       | 6                           | 161.14                                          | 26.027                      |
| Flandres-Briand Fjord      | -63.021   | -65.035  | 4.2             | 2              | 2.1                | narrow       | 4                           | 81.26                                           | 8.931                       |
| Flandres-Etienne Fjord     | -63.234   | -65.171  | 8               | 3.2            | 2.5                | narrow       | 7                           | 244.5                                           | 24.587                      |
| Beascochea-Lever Gl. cove  | -63.723   | -65.512  | 5.3             | 2.5            | 2.1                | narrow       | 4                           | 190.72                                          | 16.000                      |
| Beascochea Bay             | -63.87    | -65.515  | 24              | 10             | 2.4                | narrow       | 17                          | 155.02                                          | 235.377                     |
| Beascochea-Funk Gl. cove   | -63.756   | -65.58   | 4               | 2              | 2.0                | narrow       | 2                           | 157.77                                          | 7.874                       |
| Flandres Bay               | -63.148   | -65.072  | 30              | 16             | 1.9                | broad        | 23                          | 774.64                                          | 453.073                     |
| Hughes-Cierva Cove         | -60.87    | -64.155  | 5               | 3              | 1.7                | broad        | 2                           | 256.36                                          | 14.056                      |
| Hughes-Brialmont Cove      | -60.987   | -64.281  | 11              | 7.5            | 1.5                | broad        | 5                           | 842.53                                          | 85.500                      |
| Beascochea-Cadman Gl. cove | -63.812   | -65.612  | 3               | 3              | 1.0                | broad        | 1                           | 307.04                                          | 8.915                       |
| Advord-Lester Gl. cove     | -62.58    | -64.901  | 5               | 3.8            | 1.3                | broad        | 2                           | 276.33                                          | 16.997                      |
| Maxwell Bay                | -58.848   | -62.229  | 15              | 10.4           | 1.4                | broad        | 4                           | 92.14                                           | 140.666                     |
| Collins Bay                | -64.054   | -65.346  | 5.6             | 9.5            | 0.6                | open         | 4                           | 614.11                                          | 52.430                      |

5 Table 2. Seafloor features mapped in western Antarctic Peninsula bays

| Bay Name                   | Drumlins | GZW | Moraines | Basins | Streamlined Features | Flutings | Slope Failures | Meltwater Channels | Total Features per Bay |
|----------------------------|----------|-----|----------|--------|----------------------|----------|----------------|--------------------|------------------------|
| Maxwell-Marian Cove        | 0        | 1   | 4        | 3      | 0                    | 5        | 10             | 7                  | 30                     |
| Maxwell-Potter Cove        | 0        | 1   | 11       | 1      | 0                    | 0        | 0              | 0                  | 13                     |
| Hope Bay                   | 0        | 2   | 10       | 2      | 0                    | 0        | 0              | 5                  | 19                     |
| Lapeyriere's unnamed       | 0        | 1   | 0        | 1      | 0                    | 0        | 10             | 5                  | 17                     |
| Lapeyriere Bay             | 0        | 1   | 0        | 2      | 3                    | 7        | 40             | 23                 | 76                     |
| Fournier Bay               | 0        | 1   | 0        | 1      | 5                    | 20       | 0              | 27                 | 54                     |
| Charlotte Bay              | 0        | 2   | 0        | 2      | 15                   | 0        | 0              | 16                 | 35                     |
| Advord Bay                 | 8        | 1   | 0        | 3      | 0                    | 13       | 0              | 25                 | 50                     |
| Advord-Moser Gl. cove      | 0        | 2   | 0        | 2      | 0                    | 4        | 0              | 5                  | 13                     |
| Flandres-Briand Fjord      | 0        | 2   | 0        | 1      | 0                    | 3        | 0              | 9                  | 15                     |
| Flandres-Etienne Fjord     | 0        | 1   | 0        | 1      | 0                    | 0        | 0              | 4                  | 6                      |
| Beascochea-Lever Gl. cove  | 0        | 2   | 0        | 1      | 0                    | 25       | 0              | 0                  | 28                     |
| Beascochea Bay             | 6        | 2   | 0        | 4      | 23                   | 13       | 30             | 90                 | 168                    |
| Beascochea-Funk Gl. cove   | 0        | 1   | 0        | 1      | 0                    | 17       | 0              | 33                 | 52                     |
| Flandres Bay               | 0        | 2   | 0        | 5      | 12                   | 17       | 20             | 83                 | 139                    |
| Hughes-Cierva Cove         | 0        | 2   | 0        | 3      | 0                    | 13       | 0              | 6                  | 24                     |
| Hughes-Brialmont Cove      | 0        | 0   | 0        | 4      | 0                    | 8        | 0              | 24                 | 36                     |
| Beascochea-Cadman Gl. cove | 0        | 1   | 0        | 1      | 0                    | 0        | 20             | 8                  | 30                     |
| Advord-Lester Gl. cove     | 0        | 0   | 0        | 2      | 3                    | 5        | 0              | 19                 | 29                     |
| Maxwell Bay                | 0        | 0   | 0        | 1      | 7                    | 0        | 30             | 7                  | 45                     |
| Collins Bay                | 0        | 0   | 0        | 2      | 5                    | 0        | 0              | 21                 | 28                     |
| Total Features per Type:   | 14       | 25  | 25       | 43     | 73                   | 150      | 160            | 417                | 907                    |
